# Supplementary material for: Seasonal variation of nitryl chloride and its relation to gas-phase precursors during the JULIAC campaign in Germany
Source: Copernicus journal article supplement (doi:10.5194/acp-2022-386), 2022-06-07
Supplement: Supplementary file 1 [file acp-2022-386-supplement.pdf]

## **Supporting Information to “Seasonal variation of nitryl chloride and its relation to gas-phase precursors during the JULIAC campaign in Germany”**

Zhaofeng Tan<sup>1</sup>, Hendrik Fuchs<sup>1</sup>, Andreas Hofzumahaus<sup>1</sup>, William J. Bloss<sup>3</sup>, Birger Bohn<sup>1</sup>, Changmin Cho<sup>1</sup>, Thorsten Hohaus<sup>1</sup>, Frank Holland<sup>1</sup>, Chandrakiran Lakshmisha<sup>1</sup>, Lu Liu<sup>1</sup>, Paul S. Monks<sup>2</sup>, Anna Novelli<sup>1</sup>, Doreen Niether, Franz Rohrer<sup>1</sup>, Ralf Tillmann<sup>1</sup>, Thalassa Valkenburg<sup>2</sup>, Vaishali Vardhan<sup>1,a</sup>, Astrid Kiendler-Scharr<sup>1</sup>, Andreas Wahner<sup>1</sup>, Roberto Sommariva<sup>2,3</sup>

<sup>1</sup> Institute of Energy and Climate Research, IEK-8: Troposphere, Forschungszentrum Jülich GmbH, Jülich, Germany

<sup>2</sup> School of Chemistry, University of Leicester, Leicester, UK

<sup>3</sup> School of Geography, Earth and Environmental Sciences, University of Birmingham, Birmingham, UK

<sup>a</sup> now at, Department of Chemistry, University College Cork, Ireland

Correspondence: Zhaofeng Tan ([zh.tan@fz-juelich.de](mailto:zh.tan@fz-juelich.de)) and Roberto Sommariva ([rs445@le.ac.uk](mailto:rs445@le.ac.uk))

**Table S1.** Median, interquartile range (25%-75% percentiles) and maximum concentrations of 15-min averaged ClNO<sub>2</sub>, NO<sub>2</sub> and O<sub>3</sub> concentrations during nighttime ( $j_{\text{NO}_3} < 1 \times 10^{-4} \text{ s}^{-1}$ ) in the different measurement periods of the JULIAC campaign.

|                          |           | 31 Jan – 8 Feb | 4 – 31 Aug  | 9 – 30 Sep  | 1 – 25 Nov | 1 – 31 Dec |
|--------------------------|-----------|----------------|-------------|-------------|------------|------------|
| ClNO <sub>2</sub> / pptv | Median    | 150            | 22          | 45          | 46         | 80         |
|                          | 25% – 75% | 76 – 300       | 7 – 99      | 7 – 156     | 15 – 110   | 38 – 160   |
|                          | Maximum   | 950            | 1410        | 1600        | 450        | 630        |
| NO / ppbv                | Median    | 0.13           | 0.20        | 0.35        | 0.18       | N.A.       |
|                          | 25% – 75% | 0.01 – 1.2     | 0.04 – 0.68 | 0.03 – 0.93 | 0.02 – 1.4 | N.A.       |
|                          | Maximum   | 33             | 6.4         | 12          | 19         | N. A.      |
| NO <sub>2</sub> / ppbv   | Median    | 7.6            | 3.9         | 4.2         | 7.8        | 5.2        |
|                          | 25% – 75% | 3.7 – 13       | 2.2 – 6.2   | 2.6 – 6.9   | 4.2 – 12.0 | 2.9 – 8.5  |
|                          | Maximum   | 29             | 27          | 26          | 29         | 25         |
| O <sub>3</sub> / ppbv    | Median    | 25             | 36          | 27          | 16         | 25         |
|                          | 25% – 75% | 17 – 32        | 27 – 48     | 22 – 33     | 9 – 24     | 15 – 31    |
|                          | Maximum   | 38             | 100         | 64          | 36         | 42         |
| T / °C                   | Median    | 4.4            | 20.8        | 16.7        | 8.0        | 8.4        |
|                          | 25% – 75% | 2.1 – 7.4      | 18 – 24     | 15 – 19     | 6 – 11     | 5 – 11     |
|                          | Maximum   | 12             | 34          | 29          | 19         | 19         |
| RH / %                   | Median    | 71             | 49          | 72          | 88         | 86         |
|                          | 25% – 75% | 59 – 79        | 27 – 65     | 55 – 88     | 81 – 93    | 76 – 92    |
|                          | Maximum   | 86             | 82          | 100         | 100        | 100        |

**Table S2.** Aerosol composition measured by AMS during the intensive measurement periods of the JULIAC campaign.

|     | Group      | PM <sub>1</sub><br>μg/m <sup>3</sup> | NO <sub>3</sub><br>μg/m <sup>3</sup> | SO <sub>4</sub><br>μg/m <sup>3</sup> | NH <sub>4</sub><br>μg/m <sup>3</sup> | Cl<br>μg/m <sup>3</sup> | Organic<br>μg/m <sup>3</sup> |
|-----|------------|--------------------------------------|--------------------------------------|--------------------------------------|--------------------------------------|-------------------------|------------------------------|
| Feb | Regional   | 0.97                                 | 0.24                                 | 0.10                                 | 0.09                                 | 0.01                    | 0.53                         |
|     | Long-Range | 0.17                                 | 0.10                                 | 0.11                                 | 0.11                                 | 0.13                    | 0.26                         |
| Aug | Regional   | 11.59                                | 0.51                                 | 2.93                                 | 1.18                                 | 0.02                    | 6.96                         |
|     | Long-Range | 3.83                                 | 0.20                                 | 1.03                                 | 0.41                                 | 0.01                    | 2.17                         |
| Nov | Regional   | 4.63                                 | 1.09                                 | 0.76                                 | 0.50                                 | 0.05                    | 2.23                         |
|     | Long-Range | 0.88                                 | 0.09                                 | 0.15                                 | 0.06                                 | 0.02                    | 0.55                         |

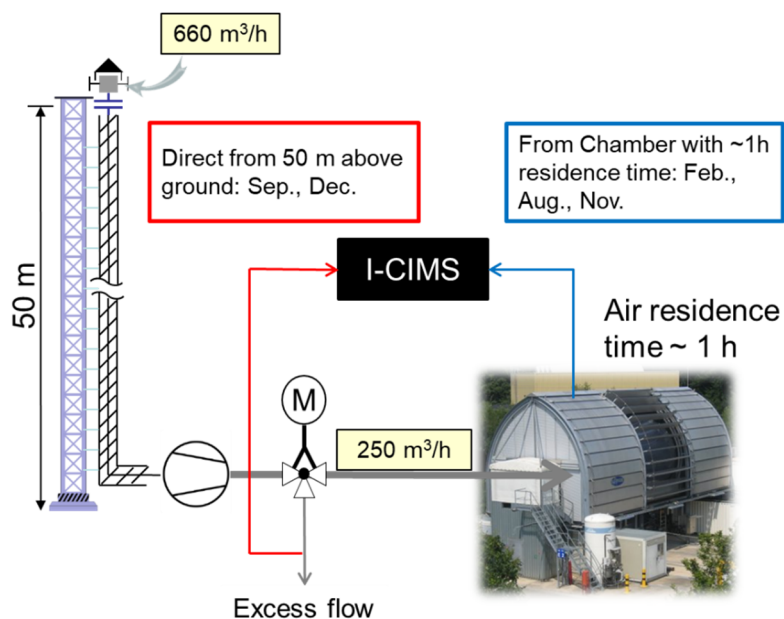

**Figure S1.** Schematic of the experimental setup of the JULIAC-SAPHIR system indicating the sampling points for the ClNO<sub>2</sub> measurements. During the intensive measurement periods of the JULIAC campaign (February, August, November), the I-CIMS instrument sampled from the SAPHIR chamber (blue line). Between the intensive measurement periods of the JULIAC campaign (September, December), the I-CIMS instrument sampled directly from the JULIAC tower (red line).



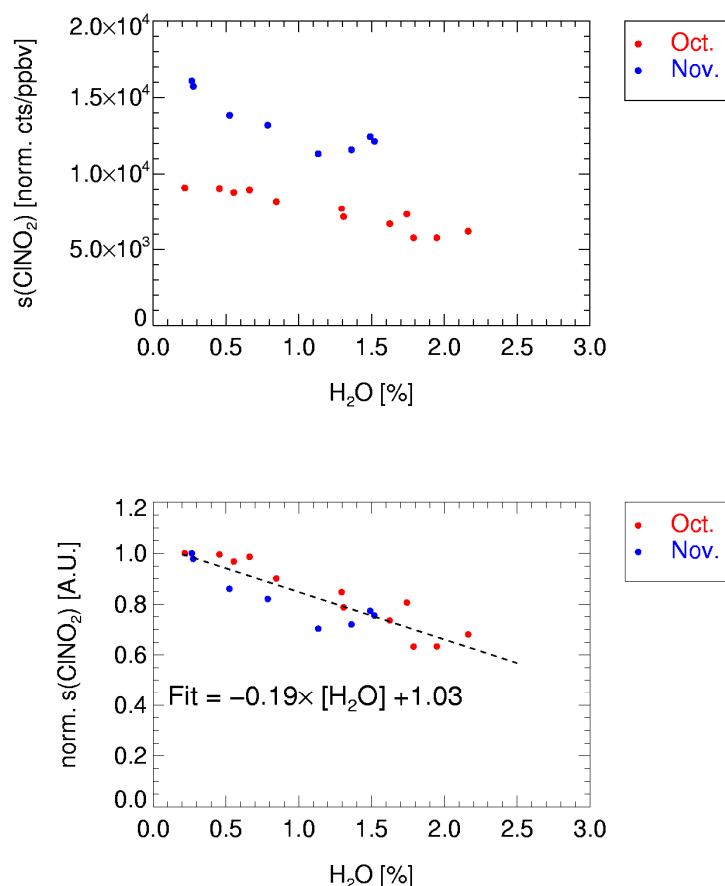

**Figure S2.** I-CIMS sensitivity dependence on the water vapor content determined in October and November during the JULIAC campaign. In calibration experiments, the inlet was overflowed with air containing a constant concentration of  $\text{ClNO}_2$  ( $\sim 5$  ppbv) while varying the humidity. Upper panel:  $\text{ClNO}_2$  signal (208 amu) normalized to the  $(\text{I} \cdot (\text{H}_2\text{O}))^+$  signal (145 amu) versus the  $\text{H}_2\text{O}$  mixing ratio by volume. Lower panel: Signals normalized to the maximum  $\text{ClNO}_2$  signal ( $s(\text{ClNO}_2)/s(\text{ClNO}_2)_{\text{max}}$ ). A linear fit is used to derive the humidity dependence giving a decrease in the instrument sensitivity of 19% per 1%  $\text{H}_2\text{O}$  concentration.

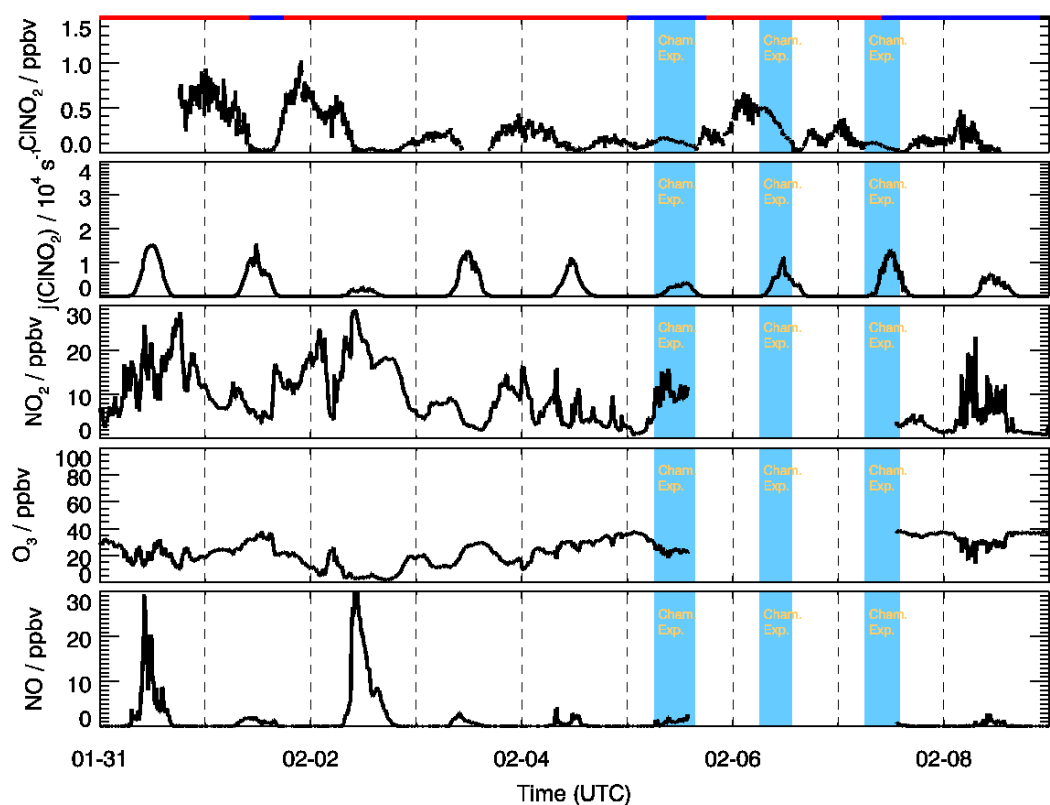

**Figure S3.** Time series of photolysis frequency  $j(\text{CINO}_2)$ ,  $\text{CINO}_2$ ,  $\text{NO}_2$ ,  $\text{O}_3$ , and  $\text{NO}$  concentrations in February of the JULIAC campaign. Horizontal blue and red lines indicate air mass from long-range (blue) and regional transportation (red), respectively (Section 3.2). The color filled areas indicate periods when characterization experiments were performed: these measurements were excluded from the analysis.

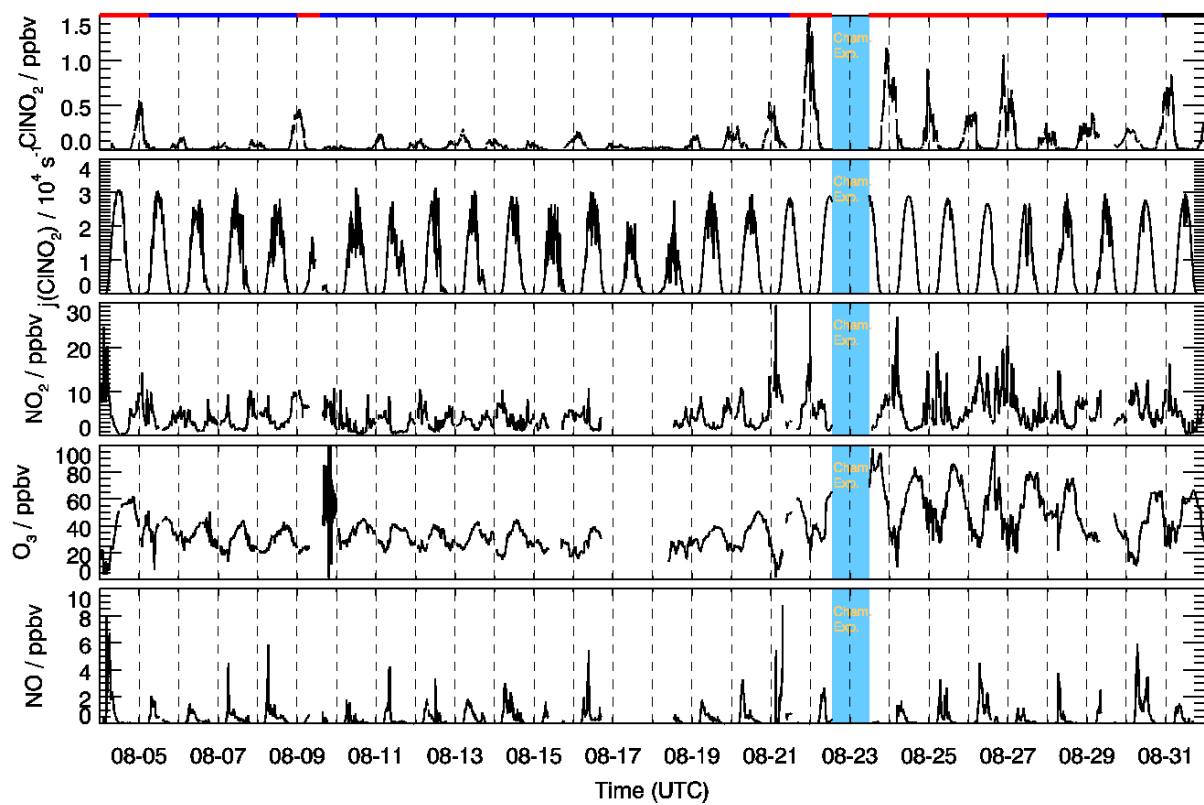

**Figure S4.** Same as Figure S3 but for the measurements in August.

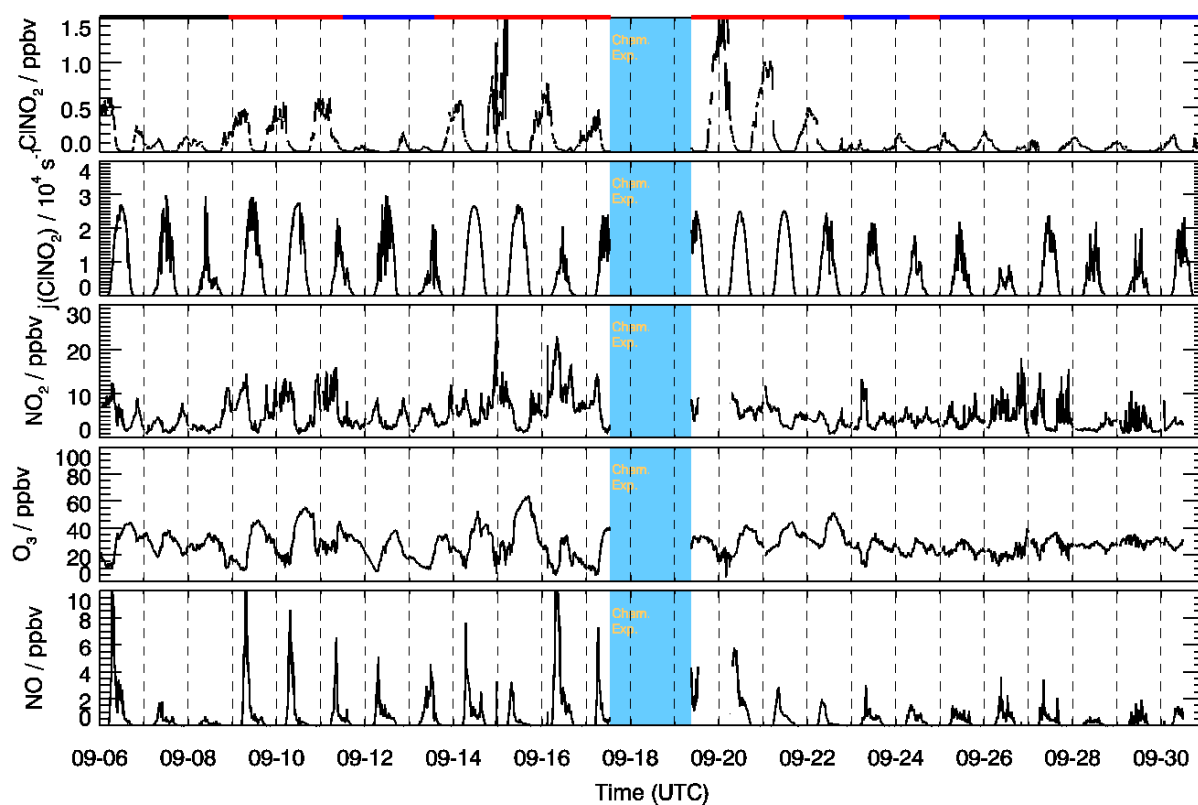

**Figure S5.** Same as Figure S3 but for the measurements in September.

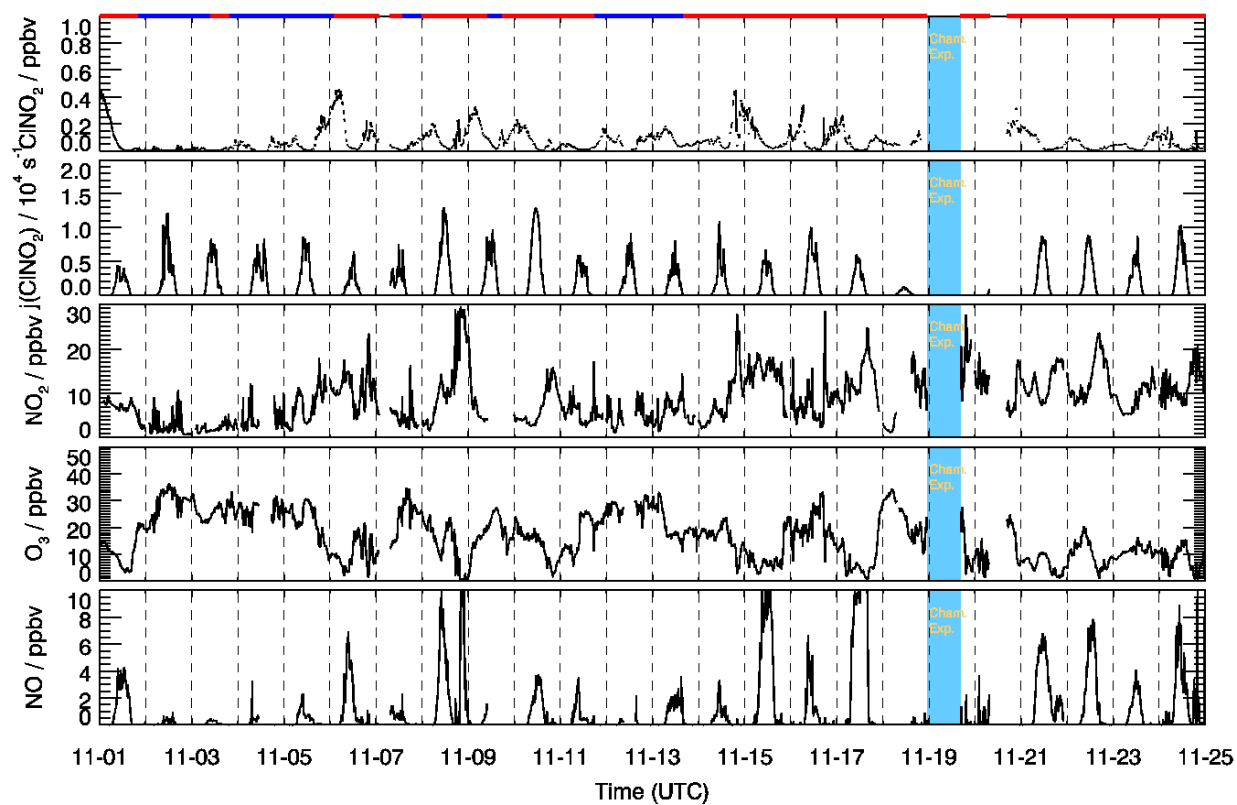

**Figure S6.** Same as Figure S3 but for the measurements in November.

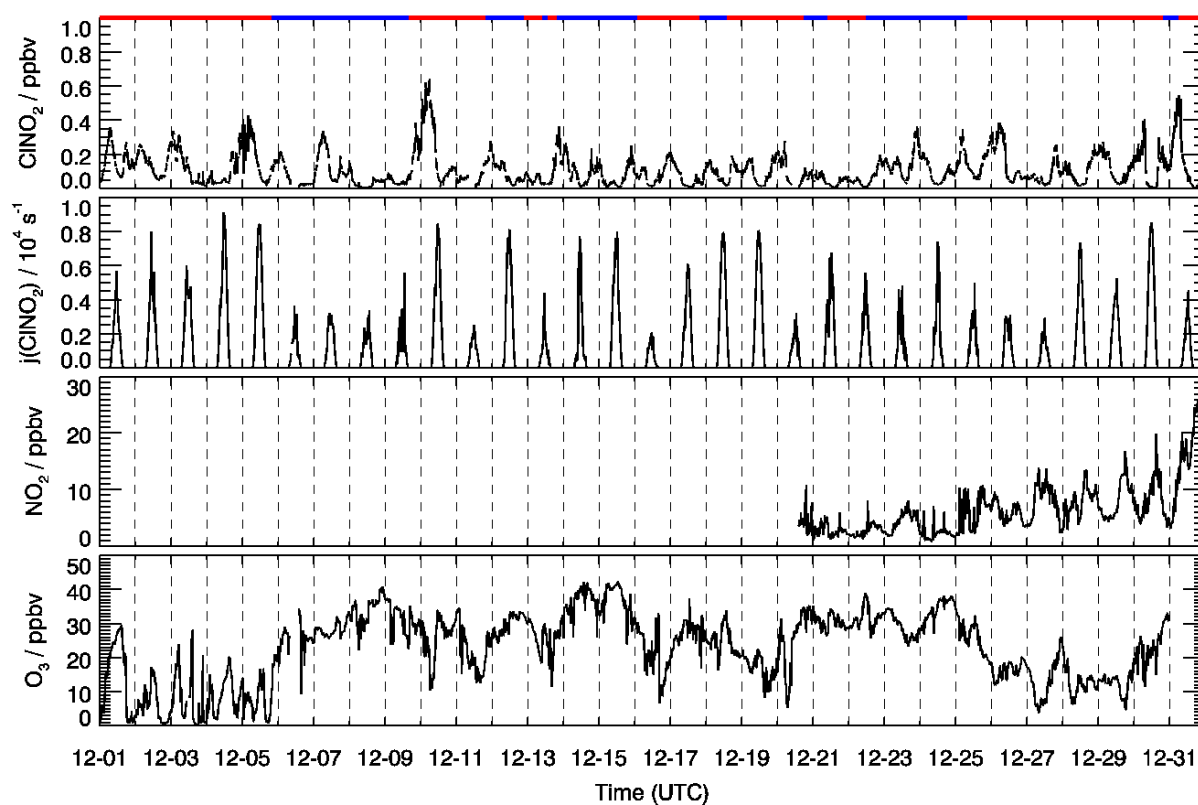

**Figure S7.** Same as Figure S3 but for the measurements in December. During this period NO measurements were not available.

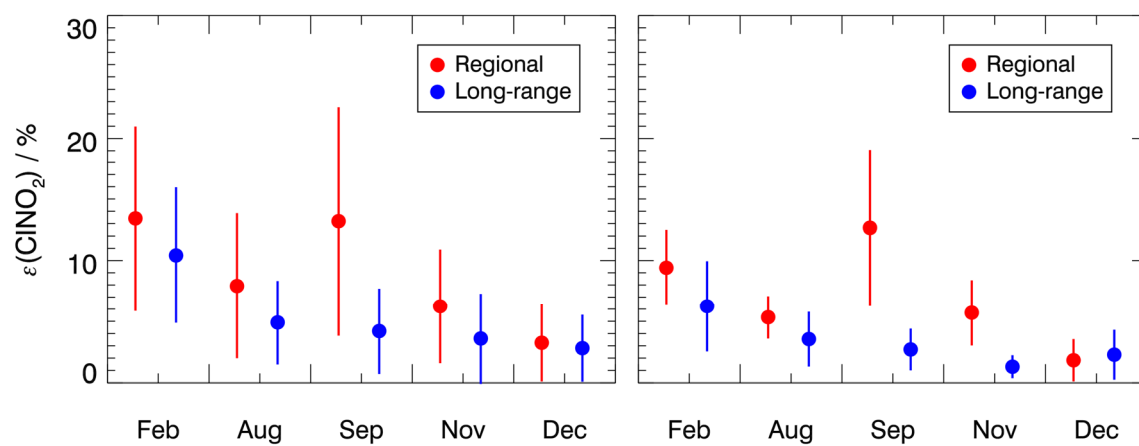

**Figure S8.** Same as Fig. 5 but for all nighttime data (left) and for data 1 hour ( $\pm 0.5$ h interval) before sunrise (right).

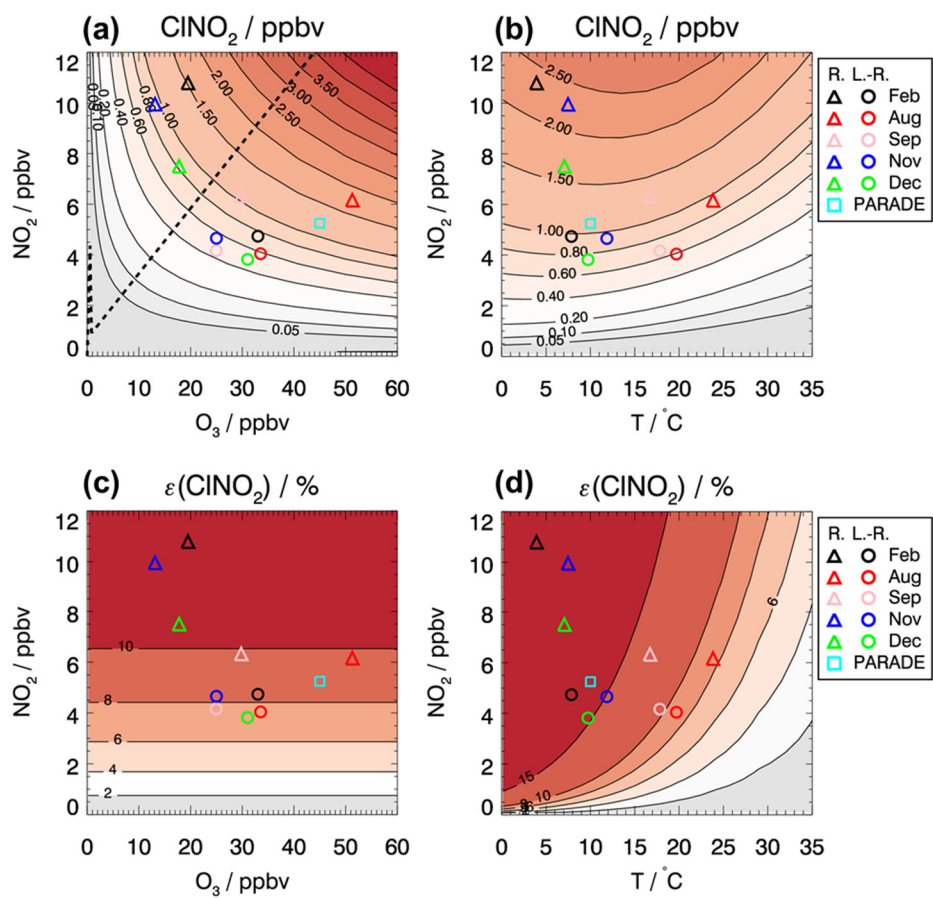

**Figure S9.** Same as Fig. 6 but the  $\text{NO}_3$  radical chemical loss rate constant is decreased from  $0.001 \text{ s}^{-1}$  to  $0.0005 \text{ s}^{-1}$ .



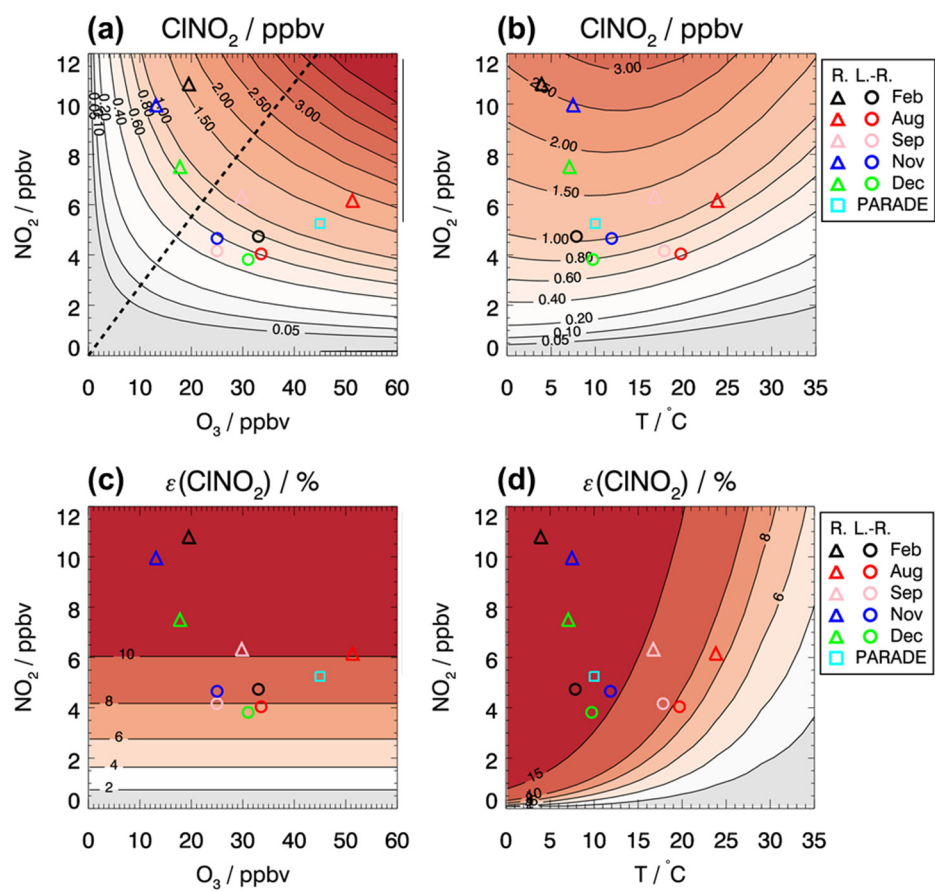

**Figure S10.** Same as Fig. 6 but the  $\text{N}_2\text{O}_5$  heterogeneous uptake coefficient on aerosol is increased from 0.01 to 0.02.

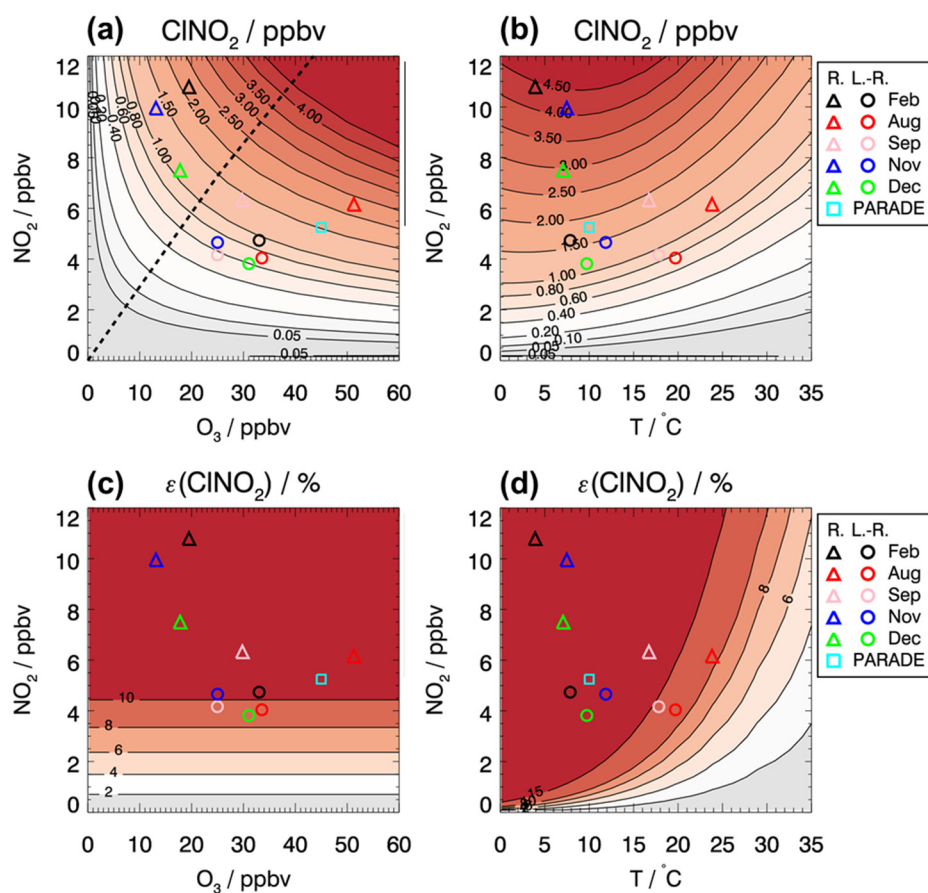

**Figure S11.** Same as Fig. 6 but the yield of  $\text{ClNO}_2$  in the heterogeneous reaction of  $\text{N}_2\text{O}_5$  on aerosol is increased from 0.5 to 1.0.
